# Supplementary material for: Self-reducible copper inks composed of copper–amino complexes and preset submicron copper seeds for thick conductive patterns on a flexible substrate
Source: Royal Society of Chemistry journal article supplement (doi:10.1039/c6tc02914k), 2016-01-01
Supplement: c6tc02914k1.pdf [file c6tc02914k1.pdf]

**Supporting information**

Low-temperature and self-reducible copper ink  
composed of copper-amino complexes and  
preset submicron copper seeds for high  
performance thick copper patterns on a  
flexible substrate

Wanli Li, Jinting Jiu, Shijo Nagao, and Katsuaki Suganuma

The Institute of Scientific and Industrial Research (ISIR), Osaka University, Mihogaoka  
8-1, Ibaraki, Osaka567-0047, Japan

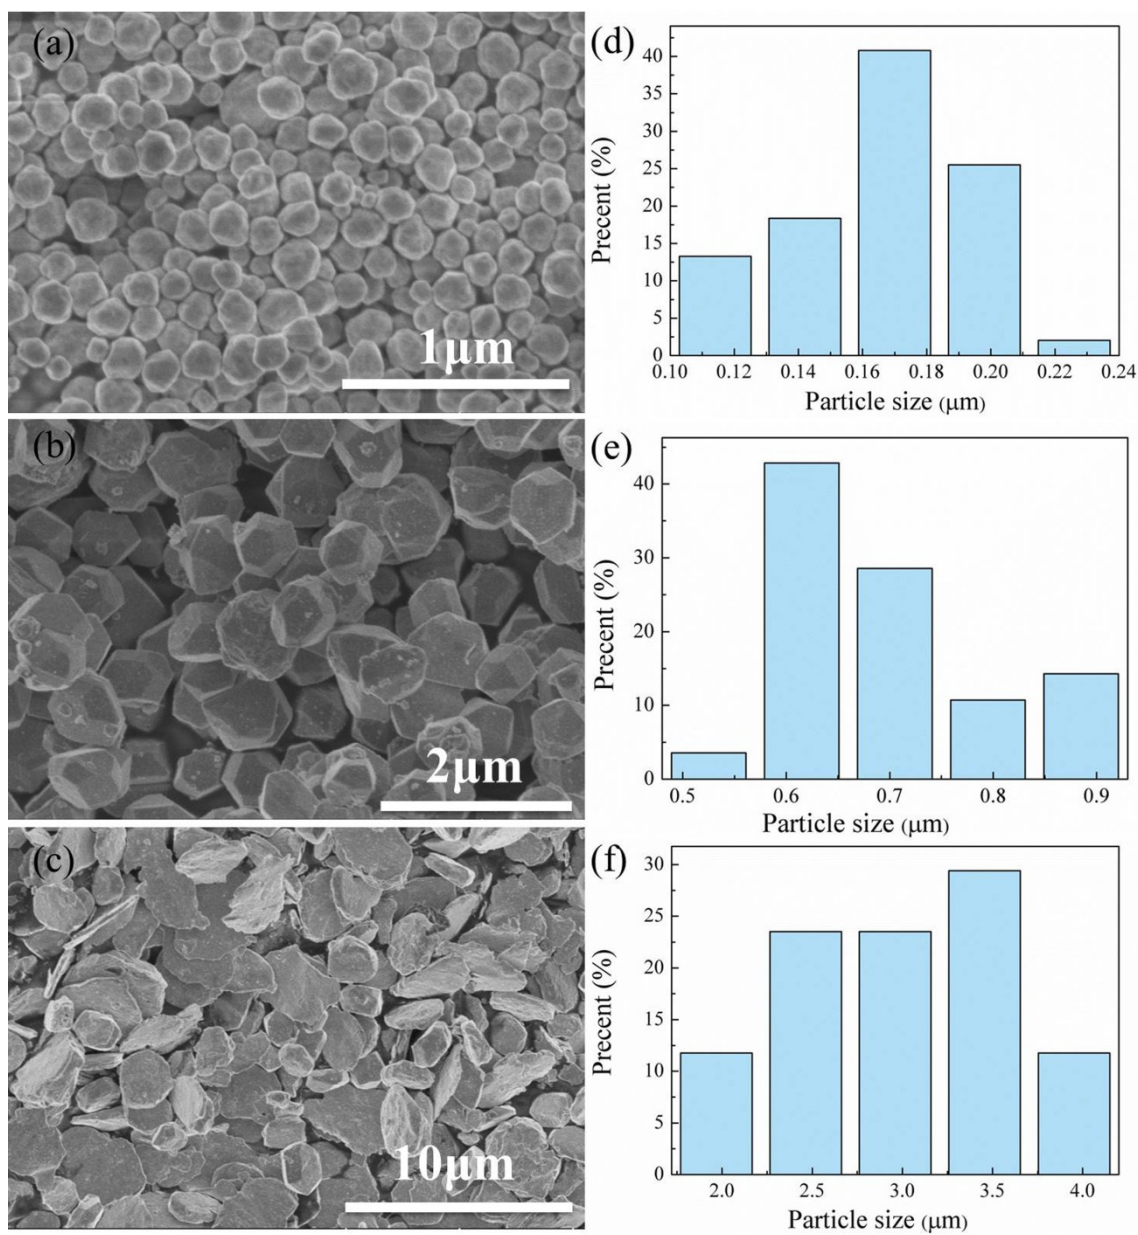

**Fig. S1** SEM micrographs of received copper particles (a) seeds A, (b) seeds B and (c) seeds C, and (d)-(f) are the corresponding particle size distribution.

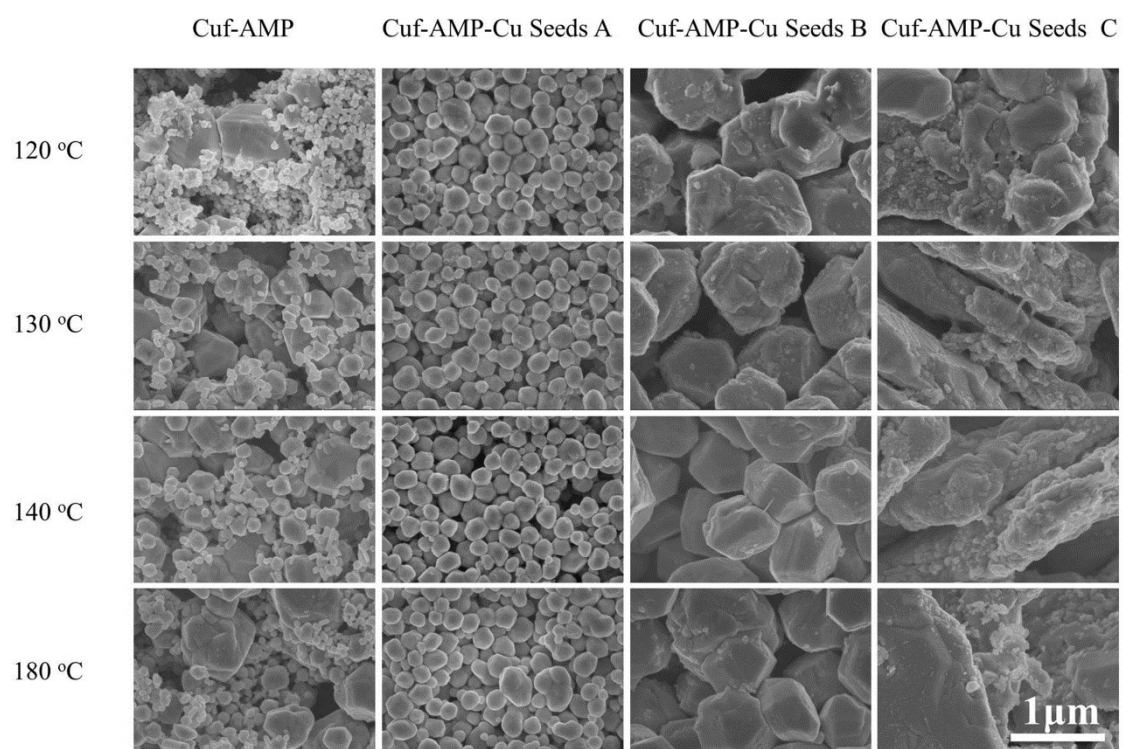

**Fig. S2** Microstructure of sintered patterns after heat treatment at 120 °C, 130 °C, 140 °C and 180 °C under nitrogen atmosphere.

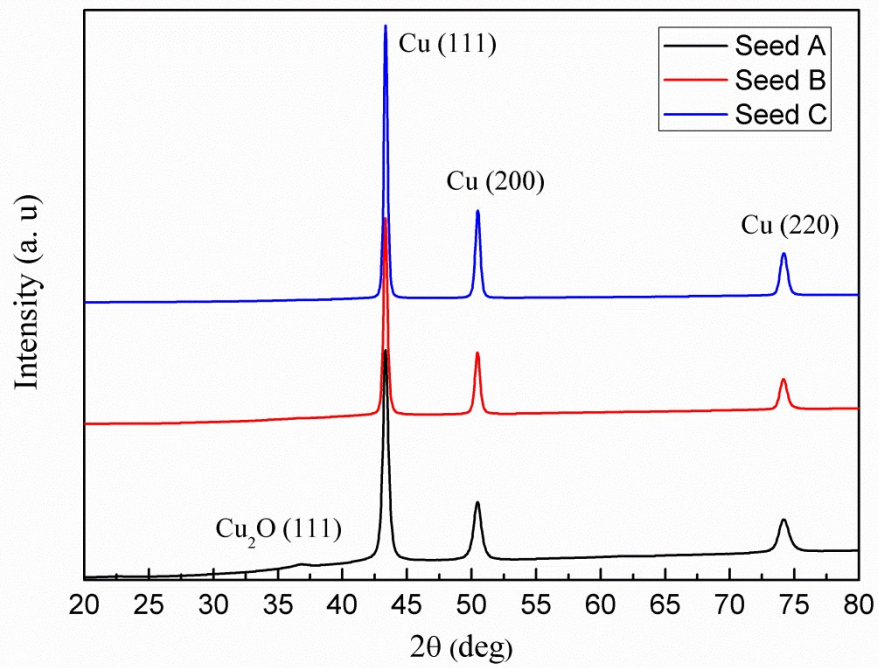

**Fig. S3** XRD patterns of seeds A, B and C.

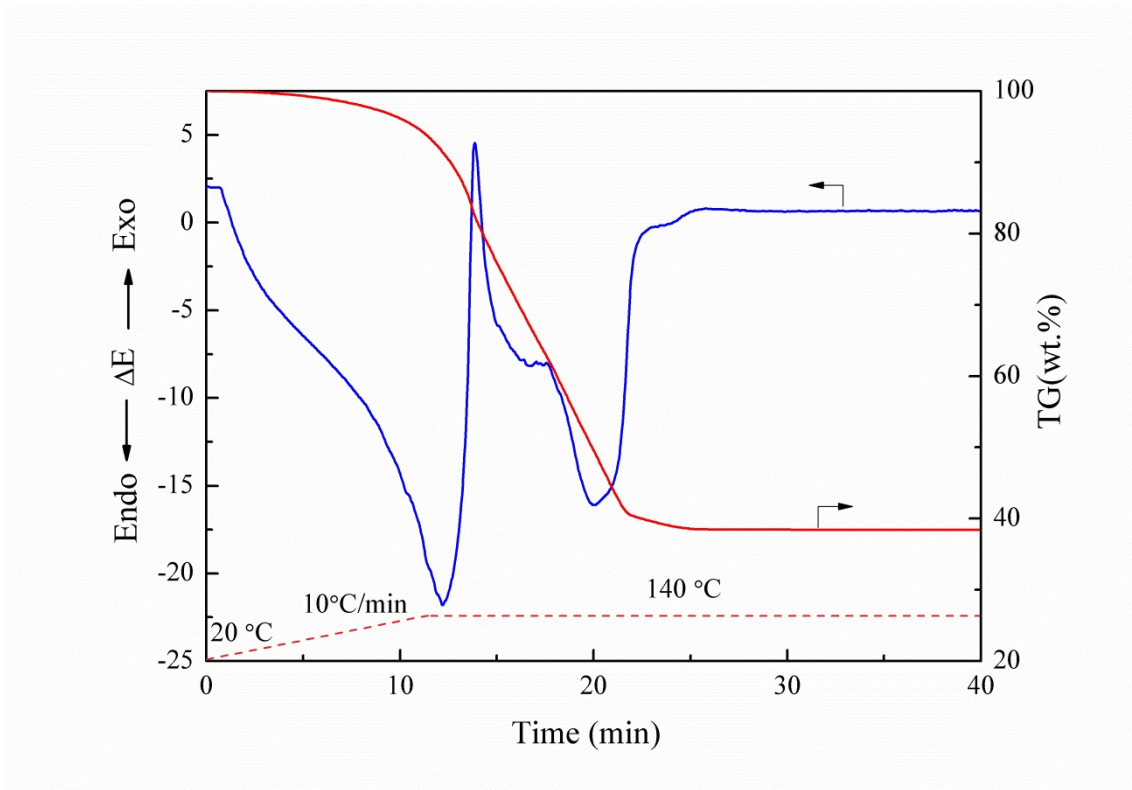

**Fig. S4** Relative thermal decomposition analysis using TGA-DAT.
